# Supplementary material for: Assessing Consumer Health Vocabulary Familiarity: An Exploratory Study
Source: J Med Internet Res. 2007 Mar 14;9(1):e5. doi: 10.2196/jmir.9.1.e5 (PMC1874513; doi:10.2196/jmir.9.1.e5)
Supplement: Supplementary file 1 [file jmir_v9i1e5_app1.pdf]

For each item below, check a single word or phrase that is most closely related to the bolded word. If none seem related, check “don’t know.”

**1. Acute**

- ☐ short and severe
- ☐ gradual
- ☐ painless
- ☐ don’t know

**2. Artery**

- ☐ nerve
- ☐ muscle
- ☐ blood vessel
- ☐ don’t know

**3. Chronic**

- ☐ immediate
- ☐ long-term
- ☐ burning
- ☐ don’t know

**4. Diabetes**

- ☐ disease
- ☐ test
- ☐ procedure
- ☐ don’t know

**5. Hormone**

- ☐ herbal pill
- ☐ vitamin
- ☐ chemical
- ☐ don’t know

**6. Amputation**

- ☐ exercise
- ☐ injection
- ☐ surgery
- ☐ don’t know

**7. Pulse**

- ☐ heart beat
- ☐ breathing
- ☐ temperature
- ☐ don’t know

**8. Renal**

- ☐ heart
- ☐ kidney
- ☐ lung
- ☐ don’t know

**9. Spleen**

- ☐ organ
- ☐ fluid
- ☐ powerhouse
- ☐ don’t know

**10. Water Pill**

- ☐ birth control
- ☐ placebo (fake pill)
- ☐ medicine
- ☐ don’t know

**11. Aneurysm**

- ☐ urinary tract
- ☐ bones
- ☐ blood vessels
- ☐ don’t know

**12. Ocular**

- ☐ eye
- ☐ ear
- ☐ nerves
- ☐ don’t know

**13. Diastolic**

- ☐ blood pressure
- ☐ temperature
- ☐ breathing
- ☐ don’t know

**14. Aorta**

- ☐ organ
- ☐ bones
- ☐ blood vessels
- ☐ don’t know

**15. Vasodilator**

- ☐ medication

☐ device  
☐ test  
☐ don't know

**16. Cancer**

☐ broken bone  
☐ tumor  
☐ allergy  
☐ don't know

**17. Asthma**

☐ lungs  
☐ heart  
☐ kidneys  
☐ don't know

**18. Muscle**

☐ taste  
☐ hearing  
☐ movement  
☐ don't know

**19. Hospital**

☐ treatment  
☐ investment  
☐ entertainment  
☐ don't know

**20. Surgery**

☐ sound waves  
☐ knife  
☐ camera  
☐ don't know

**21. Intestines**

☐ chest  
☐ stomach  
☐ head  
☐ don't know

**22. Respiratory**

☐ heat  
☐ ears

☐ lungs  
☐ don't know

**23. Ulcer**

☐ digestive problem  
☐ breathing problem  
☐ movement disorder  
☐ don't know

**24. Biopsy**

☐ treatment  
☐ test  
☐ nutrition program  
☐ don't know

**25. Acid reflux**

☐ stomach  
☐ eyes  
☐ urinary tract  
☐ don't know

**26. Pulmonary fibrosis**

☐ breathing test  
☐ lung disease  
☐ bone disease  
☐ don't know

**27. Antacids**

☐ medicine  
☐ mouth rinse  
☐ food supplement  
☐ don't know

**28. Sphincter**

☐ blood vessels  
☐ nerves  
☐ muscles  
☐ don't know

**29. Forceps**

☐ instrument/device  
☐ disease  
☐ medicine (pill)

☐ don't know

**30. Hiatal hernia**

☐ intestines problem  
☐ stomach problem  
☐ liver problem  
☐ don't know

**31. Prescription drugs**

☐ food  
☐ medicine  
☐ cleaning supplies  
☐ don't know

**32. Lower back**

☐ body part  
☐ instrument  
☐ medical chart  
☐ don't know

**33. Exercise**

☐ medicine  
☐ surgery  
☐ activity  
☐ don't know

**34. Arthritis**

☐ instrument  
☐ disease  
☐ liquid  
☐ don't know

**35. Doctor**

☐ construction  
☐ treatment  
☐ accounting  
☐ don't know

**36. Acupuncture**

☐ surgery  
☐ test  
☐ alternative medicine  
☐ don't know

**37. Flexibility**

☐ muscles and joints  
☐ lungs  
☐ skin  
☐ don't know

**38. Osteoporosis**

☐ medicine  
☐ procedure  
☐ disease  
☐ don't know

**39. Inflammation**

☐ pain and swelling  
☐ numbness  
☐ heavy bleeding  
☐ don't know

**40. Recurrence**

☐ treatment  
☐ problem  
☐ insurance  
☐ don't know

**41. Lumbar**

☐ lower back  
☐ shoulders  
☐ neck  
☐ don't know

**42. Erythrocyte**

☐ urine  
☐ blood  
☐ sweat  
☐ don't know

**43. Fibromyalgia**

☐ treatment  
☐ test  
☐ disease  
☐ don't know

**44. Scoliosis**

- ☐ spine
- ☐ throat
- ☐ heart
- ☐ don't know

**45. Fascia**

- ☐ organ
- ☐ tissue
- ☐ bodily fluid
- ☐ don't know

**46. Cancer**

- ☐ infection of cells
- ☐ spread of abnormal cells
- ☐ low white blood cell count
- ☐ don't know

**47. Asthma**

- ☐ inflammation of airways
- ☐ hardening of lungs
- ☐ lung infection
- ☐ don't know

**48. Muscle**

- ☐ tissue that connects organs
- ☐ tissue that covers organs
- ☐ tissue that can contract
- ☐ don't know

**49. Hospital**

- ☐ provides medical treatment
- ☐ sells health food
- ☐ educates healthcare investors
- ☐ don't know

**50. Surgery**

- ☐ getting a blood sample
- ☐ removing or repairing a body part
- ☐ bouncing sound waves off an organ
- ☐ don't know

**51. Intestines**

- ☐ move food from mouth to stomach
- ☐ digest food
- ☐ remove poisons from blood
- ☐ don't know

**52. Respiratory**

- ☐ breathing in oxygen
- ☐ breathing in carbon dioxide
- ☐ regulating body temperature
- ☐ don't know

**53. Ulcer**

- ☐ open sore
- ☐ upset stomach
- ☐ nervous spasm
- ☐ don't know

**54. Biopsy**

- ☐ bouncing waves off tissues
- ☐ recording electrical activity
- ☐ removing a sample of tissue
- ☐ don't know

**55. Acid reflux**

- ☐ swallowing problem
- ☐ death of tissue
- ☐ backflow from stomach
- ☐ don't know

**56. Pulmonary fibrosis**

- ☐ scarring of lungs
- ☐ mucus in lungs
- ☐ fluid in lungs
- ☐ don't know

**57. Antacids**

- ☐ reduce fever
- ☐ relieve heartburn
- ☐ decrease appetite
- ☐ don't know

**58. Sphincter**

- ☐ a ring of muscles that opens and closes
- ☐ muscles that help the lungs fill with air
- ☐ a muscle that controls the tongue
- ☐ don't know

**59. Forceps**

- ☐ measuring blood-pressure
- ☐ numbing a body part
- ☐ holding or removing something

- ☐ don't know

**60. Hiatal hernia**

- ☐ stomach bulges up into the chest
- ☐ bulging intestines
- ☐ inflammation of the stomach
- ☐ don't know
